# Supplementary material for: Designing minimal genomes using whole-cell models
Source: PubMed Central journal article supplement (PMC7012841; doi:10.1038/s41467-020-14545-0), 2020-02-11
Supplement: 41467_2020_14545_MOESM2_ESM.pdf [file 41467_2020_14545_MOESM2_ESM.pdf]

## Designing Minimal Genomes Using Whole-Cell Models

Rees-Garbutt and Chalkley et al.

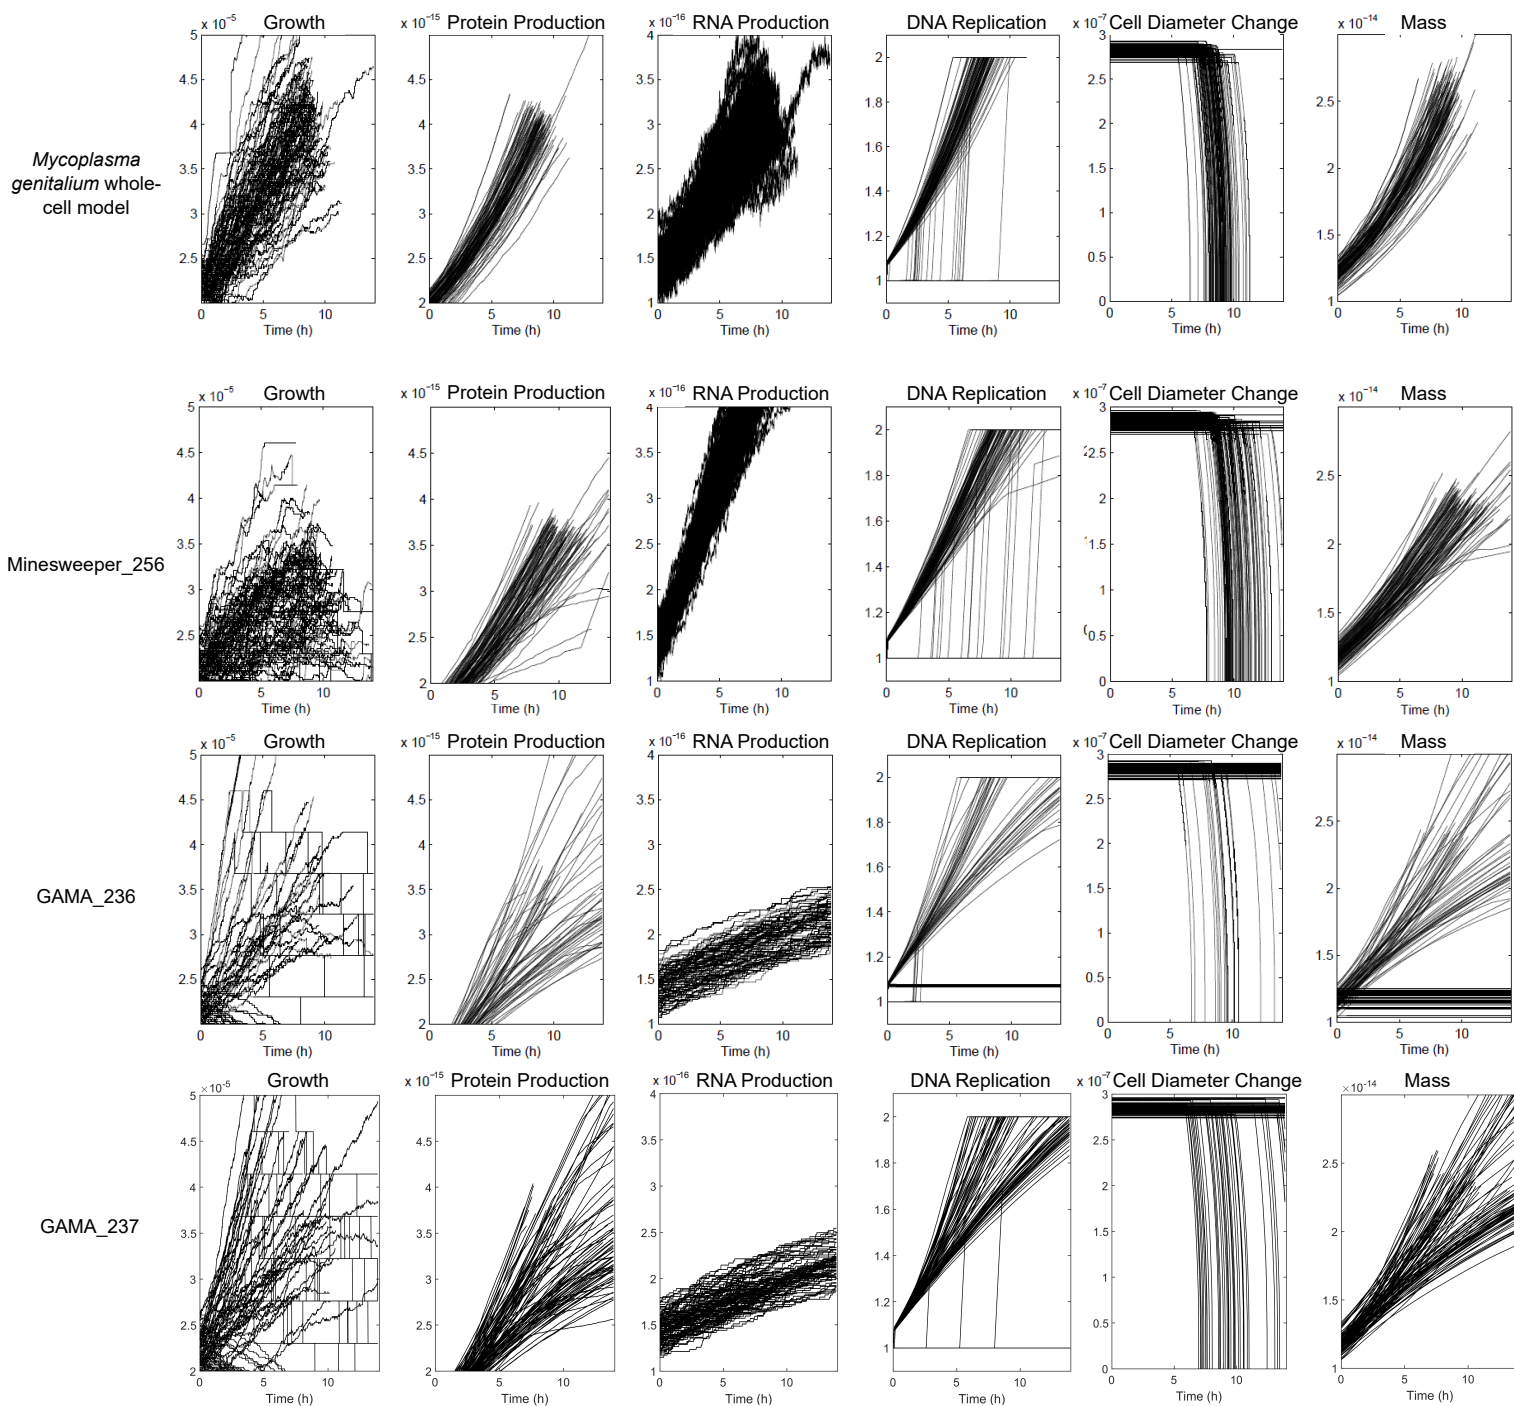

**Supplementary Figure 1. Comparison of unmodified *Mycoplasma genitalium* whole-cell model, Minesweeper\_256, GAMA\_236 and GAMA\_237 outputs**

100 in-silico replicates, with second-by-second values plotted for 6 cellular variables over 13.89 hours (the default endtime of the simulations).

The top row shows the expected cellular behaviour (previously shown by Karr et al 18) and is used for comparison. Minesweeper\_256,

GAMA\_236, GAMA\_237 show deviations in phenotype caused by gene deletions. Non aggregated data for each in-silico simulation is available

(see Methods).
